# Supplementary material for: Synthesis, structures and magnetism of a series of dinuclear and one-dimensional Ni–Ln complexes: single-molecule magnetic behavior in one-dimensional nitrate-bridged Dy analogue
Source: Royal Society of Chemistry journal article supplement (doi:10.1039/c5nj01708d), 2015-01-01
Supplement: c5nj01708d1.pdf [file c5nj01708d1.pdf]

For submission to *New J. Chem.* Revised Manuscript (NJ-ART-07-2015-001708)

## Synthesis, Structures and Magnetism of series of Binuclear and one-dimensional Ni-Ln Complexes: Single-molecule Magnetic Behavior in one-dimensional Nitrate-bridged Dy Analogue

Min-Xia Yao,\* Xing-Yun Lu, Zhao-Xia Zhu, Xiao-Wei Deng, and Su Jing\*

*College of Chemistry and Molecular Engineering, Nanjing Tech University, Nanjing,  
211816, P. R. China.*

### Supporting information

**Table S1** Selected bond lengths (Å) and angles (°) for **1**.

|                  |            |                   |            |
|------------------|------------|-------------------|------------|
| Gd(1)-O(2)       | 2.3414(18) | Gd(1)-O(5)        | 2.3494(19) |
| Gd(1)-O(14)      | 2.484(2)   | Gd(1)-O(7)        | 2.485(2)   |
| Gd(1)-O(10)      | 2.495(3)   | Gd(1)-O(13)       | 2.511(3)   |
| Gd(1)-O(6)       | 2.546(2)   | Gd(1)-O(11)       | 2.549(3)   |
| Gd(1)-O(8)       | 2.555(3)   | Gd(1)-O(1)        | 2.653(2)   |
| Gd(1)-Ni(1)      | 3.4798(6)  | Ni(1)-N(1)        | 2.011(2)   |
| Ni(1)-O(5)       | 2.0213(19) | Ni(1)-O(2)        | 2.0357(18) |
| Ni(1)-N(2)       | 2.053(2)   | Ni(1)-N(4)        | 2.088(3)   |
| Ni(1)-N(3)       | 2.134(3)   | O(2)-Gd(1)-O(5)   | 68.46(6)   |
| O(2)-Gd(1)-O(14) | 88.22(7)   | O(5)-Gd(1)-O(14)  | 77.53(7)   |
| O(2)-Gd(1)-O(7)  | 79.30(7)   | O(5)-Gd(1)-O(7)   | 90.91(7)   |
| O(14)-Gd(1)-O(7) | 165.49(8)  | O(2)-Gd(1)-O(10)  | 134.07(9)  |
| O(5)-Gd(1)-O(10) | 146.45(9)  | O(14)-Gd(1)-O(10) | 120.65(9)  |
| O(7)-Gd(1)-O(10) | 73.76(9)   | O(2)-Gd(1)-O(13)  | 76.27(8)   |
| O(5)-Gd(1)-O(13) | 117.39(8)  | O(14)-Gd(1)-O(13) | 50.83(8)   |
| O(7)-Gd(1)-O(13) | 131.23(8)  | O(10)-Gd(1)-O(13) | 94.49(10)  |

\* To whom correspondence should be addressed. Email: yaomx@njtech.edu.cn ; sjing@njtech.edu.cn. Fax: +86-25-58139528. Nanjing Tech University.

|                   |           |                   |            |
|-------------------|-----------|-------------------|------------|
| O(2)-Gd(1)-O(6)   | 130.63(6) | O(5)-Gd(1)-O(6)   | 64.09(7)   |
| O(14)-Gd(1)-O(6)  | 69.34(7)  | O(7)-Gd(1)-O(6)   | 113.61(8)  |
| O(10)-Gd(1)-O(6)  | 94.45(9)  | O(13)-Gd(1)-O(6)  | 114.40(9)  |
| O(2)-Gd(1)-O(11)  | 144.04(8) | O(5)-Gd(1)-O(11)  | 131.32(10) |
| O(14)-Gd(1)-O(11) | 71.53(9)  | O(7)-Gd(1)-O(11)  | 122.97(10) |
| O(10)-Gd(1)-O(11) | 49.65(10) | O(13)-Gd(1)-O(11) | 67.88(9)   |
| O(6)-Gd(1)-O(11)  | 70.16(10) | O(2)-Gd(1)-O(8)   | 117.28(8)  |
| O(5)-Gd(1)-O(8)   | 77.03(9)  | O(14)-Gd(1)-O(8)  | 133.16(8)  |
| O(7)-Gd(1)-O(8)   | 50.05(7)  | O(10)-Gd(1)-O(8)  | 70.22(10)  |
| O(13)-Gd(1)-O(8)  | 164.10(9) | O(6)-Gd(1)-O(8)   | 64.27(7)   |
| O(11)-Gd(1)-O(8)  | 97.87(10) | O(2)-Gd(1)-O(1)   | 62.42(7)   |
| O(5)-Gd(1)-O(1)   | 128.81(7) | O(14)-Gd(1)-O(1)  | 113.35(8)  |
| O(7)-Gd(1)-O(1)   | 67.27(8)  | O(10)-Gd(1)-O(1)  | 72.99(9)   |
| O(13)-Gd(1)-O(1)  | 64.05(9)  | O(6)-Gd(1)-O(1)   | 166.86(7)  |
| O(11)-Gd(1)-O(1)  | 98.07(10) | O(8)-Gd(1)-O(1)   | 113.29(8)  |
| N(1)-Ni(1)-O(5)   | 170.31(9) | N(1)-Ni(1)-O(2)   | 90.22(8)   |
| O(5)-Ni(1)-O(2)   | 81.14(7)  | N(1)-Ni(1)-N(2)   | 98.71(9)   |
| O(5)-Ni(1)-N(2)   | 89.98(8)  | O(2)-Ni(1)-N(2)   | 171.06(8)  |
| N(1)-Ni(1)-N(4)   | 87.67(9)  | O(5)-Ni(1)-N(4)   | 88.36(9)   |
| O(2)-Ni(1)-N(4)   | 92.71(9)  | N(2)-Ni(1)-N(4)   | 88.05(9)   |
| N(1)-Ni(1)-N(3)   | 93.30(9)  | O(5)-Ni(1)-N(3)   | 90.39(9)   |
| O(2)-Ni(1)-N(3)   | 85.40(9)  | N(2)-Ni(1)-N(3)   | 93.68(9)   |
| N(4)-Ni(1)-N(3)   | 177.87(9) |                   |            |

**Table S2** Selected bond lengths (Å) and angles (°) for **2**.

|                  |            |                   |            |
|------------------|------------|-------------------|------------|
| Tb(1)-O(4)       | 2.3283(15) | Tb(1)-O(1)        | 2.3394(16) |
| Tb(1)-O(11)      | 2.4703(17) | Tb(1)-O(7)        | 2.4730(19) |
| Tb(1)-O(13)      | 2.478(2)   | Tb(1)-O(8)        | 2.503(2)   |
| Tb(1)-O(5)       | 2.5395(19) | Tb(1)-O(14)       | 2.544(2)   |
| Tb(1)-O(10)      | 2.549(2)   | Tb(1)-O(6)        | 2.649(2)   |
| Tb(1)-Ni(1)      | 3.4695(7)  | Ni(1)-N(2)        | 2.0109(19) |
| Ni(1)-O(1)       | 2.0158(15) | Ni(1)-O(4)        | 2.0332(16) |
| Ni(1)-N(1)       | 2.0562(19) | Ni(1)-N(3)        | 2.090(2)   |
| Ni(1)-N(4)       | 2.133(2)   | O(4)-Tb(1)-O(1)   | 68.50(5)   |
| O(4)-Tb(1)-O(11) | 79.23(6)   | O(1)-Tb(1)-O(11)  | 90.77(6)   |
| O(4)-Tb(1)-O(7)  | 88.14(6)   | O(1)-Tb(1)-O(7)   | 77.66(6)   |
| O(11)-Tb(1)-O(7) | 165.39(6)  | O(4)-Tb(1)-O(13)  | 134.16(8)  |
| O(1)-Tb(1)-O(13) | 146.22(7)  | O(11)-Tb(1)-O(13) | 73.79(8)   |

|                   |           |                   |           |
|-------------------|-----------|-------------------|-----------|
| O(7)-Tb(1)-O(13)  | 120.71(8) | O(4)-Tb(1)-O(8)   | 76.28(6)  |
| O(1)-Tb(1)-O(8)   | 117.66(7) | O(11)-Tb(1)-O(8)  | 131.07(7) |
| O(7)-Tb(1)-O(8)   | 50.92(7)  | O(13)-Tb(1)-O(8)  | 94.47(8)  |
| O(4)-Tb(1)-O(5)   | 130.99(5) | O(1)-Tb(1)-O(5)   | 64.43(5)  |
| O(11)-Tb(1)-O(5)  | 113.66(6) | O(7)-Tb(1)-O(5)   | 69.52(6)  |
| O(13)-Tb(1)-O(5)  | 94.00(7)  | O(8)-Tb(1)-O(5)   | 114.45(7) |
| O(4)-Tb(1)-O(14)  | 143.70(7) | O(1)-Tb(1)-O(14)  | 131.64(8) |
| O(11)-Tb(1)-O(14) | 123.07(8) | O(7)-Tb(1)-O(14)  | 71.54(8)  |
| O(13)-Tb(1)-O(14) | 49.64(8)  | O(8)-Tb(1)-O(14)  | 67.53(8)  |
| O(5)-Tb(1)-O(14)  | 70.20(9)  | O(4)-Tb(1)-O(10)  | 117.39(6) |
| O(1)-Tb(1)-O(10)  | 76.92(7)  | O(11)-Tb(1)-O(10) | 50.22(6)  |
| O(7)-Tb(1)-O(10)  | 133.15(7) | O(13)-Tb(1)-O(10) | 70.08(8)  |
| O(8)-Tb(1)-O(10)  | 163.95(8) | O(5)-Tb(1)-O(10)  | 64.11(6)  |
| O(14)-Tb(1)-O(10) | 98.07(8)  | O(4)-Tb(1)-O(6)   | 62.85(6)  |
| O(1)-Tb(1)-O(6)   | 129.22(5) | O(11)-Tb(1)-O(6)  | 67.23(7)  |
| O(7)-Tb(1)-O(6)   | 113.40(7) | O(13)-Tb(1)-O(6)  | 72.68(8)  |
| O(8)-Tb(1)-O(6)   | 63.95(7)  | O(5)-Tb(1)-O(6)   | 166.07(6) |
| O(14)-Tb(1)-O(6)  | 97.38(9)  | O(10)-Tb(1)-O(6)  | 113.22(6) |
| N(2)-Ni(1)-O(1)   | 170.16(7) | N(2)-Ni(1)-O(4)   | 90.25(7)  |
| O(1)-Ni(1)-O(4)   | 80.91(6)  | N(2)-Ni(1)-N(1)   | 98.83(8)  |
| O(1)-Ni(1)-N(1)   | 90.05(7)  | O(4)-Ni(1)-N(1)   | 170.92(7) |
| N(2)-Ni(1)-N(3)   | 87.71(8)  | O(1)-Ni(1)-N(3)   | 88.37(7)  |
| O(4)-Ni(1)-N(3)   | 92.50(8)  | N(1)-Ni(1)-N(3)   | 88.13(8)  |
| N(2)-Ni(1)-N(4)   | 93.19(8)  | O(1)-Ni(1)-N(4)   | 90.45(7)  |
| O(4)-Ni(1)-N(4)   | 85.69(7)  | N(1)-Ni(1)-N(4)   | 93.52(8)  |
| N(3)-Ni(1)-N(4)   | 177.98(8) |                   |           |

**Table S3** Selected bond lengths (Å) and angles (°) for **3**.

|                  |            |                  |            |
|------------------|------------|------------------|------------|
| Dy(1)-O(2)       | 2.283(3)   | Dy(1)-O(5)       | 2.293(3)   |
| Dy(1)-O(15)      | 2.372(3)   | Dy(1)-O(9)       | 2.429(3)   |
| Dy(1)-O(12)      | 2.430(3)   | Dy(1)-O(11)      | 2.476(3)   |
| Dy(1)-O(1)       | 2.488(3)   | Dy(1)-O(6)       | 2.497(3)   |
| Dy(1)-O(8)       | 2.517(3)   | Dy(1)-Ni(1)      | 3.4538(6)  |
| Ni(1)-O(5)       | 2.005(3)   | Ni(1)-O(2)       | 2.010(3)   |
| Ni(1)-N(1)       | 2.023(4)   | Ni(1)-N(2)       | 2.037(4)   |
| Ni(1)-N(6)       | 2.117(4)   | Ni(1)-O(13)      | 2.161(3)   |
| O(2)-Dy(1)-O(5)  | 67.27(9)   | O(2)-Dy(1)-O(15) | 148.23(10) |
| O(5)-Dy(1)-O(15) | 135.16(10) | O(2)-Dy(1)-O(9)  | 91.95(11)  |

|                   |            |                  |            |
|-------------------|------------|------------------|------------|
| O(5)-Dy(1)-O(9)   | 80.22(10)  | O(15)-Dy(1)-O(9) | 74.50(10)  |
| O(2)-Dy(1)-O(12)  | 124.36(11) | O(5)-Dy(1)-O(12) | 121.80(11) |
| O(15)-Dy(1)-O(12) | 68.21(10)  | O(9)-Dy(1)-O(12) | 141.85(11) |
| O(2)-Dy(1)-O(11)  | 81.77(11)  | O(5)-Dy(1)-O(11) | 80.32(10)  |
| O(15)-Dy(1)-O(11) | 119.57(11) | O(9)-Dy(1)-O(11) | 160.49(11) |
| O(12)-Dy(1)-O(11) | 51.74(11)  | O(2)-Dy(1)-O(1)  | 65.67(10)  |
| O(5)-Dy(1)-O(1)   | 129.22(10) | O(15)-Dy(1)-O(1) | 95.53(10)  |
| O(9)-Dy(1)-O(1)   | 118.97(11) | O(12)-Dy(1)-O(1) | 73.38(11)  |
| O(11)-Dy(1)-O(1)  | 75.23(12)  | O(2)-Dy(1)-O(6)  | 131.23(9)  |
| O(5)-Dy(1)-O(6)   | 64.48(9)   | O(15)-Dy(1)-O(6) | 77.53(10)  |
| O(9)-Dy(1)-O(6)   | 86.73(11)  | O(12)-Dy(1)-O(6) | 77.87(11)  |
| O(11)-Dy(1)-O(6)  | 83.71(11)  | O(1)-Dy(1)-O(6)  | 150.93(10) |
| O(2)-Dy(1)-O(8)   | 73.36(10)  | O(5)-Dy(1)-O(8)  | 114.99(10) |
| O(15)-Dy(1)-O(8)  | 75.82(10)  | O(9)-Dy(1)-O(8)  | 51.39(11)  |
| O(12)-Dy(1)-O(8)  | 123.00(11) | O(11)-Dy(1)-O(8) | 141.27(12) |
| O(1)-Dy(1)-O(8)   | 67.67(10)  | O(6)-Dy(1)-O(8)  | 134.94(10) |
| O(5)-Ni(1)-O(2)   | 78.28(10)  | O(5)-Ni(1)-N(1)  | 165.19(14) |
| O(2)-Ni(1)-N(1)   | 88.03(14)  | O(5)-Ni(1)-N(2)  | 91.37(13)  |
| O(2)-Ni(1)-N(2)   | 168.75(13) | N(1)-Ni(1)-N(2)  | 102.67(16) |
| O(5)-Ni(1)-N(6)   | 87.78(13)  | O(2)-Ni(1)-N(6)  | 95.75(13)  |
| N(1)-Ni(1)-N(6)   | 87.98(14)  | N(2)-Ni(1)-N(6)  | 88.19(14)  |
| O(5)-Ni(1)-O(13)  | 98.37(11)  | O(2)-Ni(1)-O(13) | 84.83(12)  |
| N(1)-Ni(1)-O(13)  | 85.88(13)  | N(2)-Ni(1)-O(13) | 92.40(13)  |
| N(6)-Ni(1)-O(13)  | 173.81(13) |                  |            |

**Table S4** Selected bond lengths (Å) and angles (°) for **4**.

|                  |            |                   |            |
|------------------|------------|-------------------|------------|
| Tb(1)-O(5)       | 2.240(2)   | Tb(1)-O(2)        | 2.293(2)   |
| Tb(1)-O(14)      | 2.399(3)   | Tb(1)-O(12)       | 2.407(3)   |
| Tb(1)-O(9)       | 2.427(3)   | Tb(1)-O(15)       | 2.428(3)   |
| Tb(1)-O(1)       | 2.443(3)   | Tb(1)-O(11)       | 2.483(3)   |
| Tb(1)-O(6)       | 2.548(3)   | Tb(1)-Ni(1)       | 3.3479(6)  |
| Ni(1)-O(5)       | 1.999(2)   | Ni(1)-N(1)        | 2.015(3)   |
| Ni(1)-O(2)       | 2.024(2)   | Ni(1)-N(2)        | 2.067(3)   |
| Ni(1)-O(16)      | 2.070(3)   | Ni(1)-O(8)        | 2.122(2)   |
| O(5)-Tb(1)-O(2)  | 70.82(8)   | O(5)-Tb(1)-O(14)  | 131.94(11) |
| O(2)-Tb(1)-O(14) | 118.17(11) | O(5)-Tb(1)-O(12)  | 133.67(10) |
| O(2)-Tb(1)-O(12) | 135.18(10) | O(14)-Tb(1)-O(12) | 75.96(13)  |
| O(5)-Tb(1)-O(9)  | 81.38(9)   | O(2)-Tb(1)-O(9)   | 73.35(9)   |

|                   |            |                   |            |
|-------------------|------------|-------------------|------------|
| O(14)-Tb(1)-O(9)  | 146.21(11) | O(12)-Tb(1)-O(9)  | 75.05(11)  |
| O(5)-Tb(1)-O(15)  | 91.13(12)  | O(2)-Tb(1)-O(15)  | 75.87(11)  |
| O(14)-Tb(1)-O(15) | 52.31(13)  | O(12)-Tb(1)-O(15) | 127.99(13) |
| O(9)-Tb(1)-O(15)  | 149.10(12) | O(5)-Tb(1)-O(1)   | 136.30(9)  |
| O(2)-Tb(1)-O(1)   | 66.29(8)   | O(14)-Tb(1)-O(1)  | 78.05(11)  |
| O(12)-Tb(1)-O(1)  | 77.09(10)  | O(9)-Tb(1)-O(1)   | 78.88(10)  |
| O(15)-Tb(1)-O(1)  | 86.45(12)  | O(5)-Tb(1)-O(11)  | 83.03(10)  |
| O(2)-Tb(1)-O(11)  | 138.38(10) | O(14)-Tb(1)-O(11) | 103.42(13) |
| O(12)-Tb(1)-O(11) | 51.83(11)  | O(9)-Tb(1)-O(11)  | 71.11(11)  |
| O(15)-Tb(1)-O(11) | 137.98(13) | O(1)-Tb(1)-O(11)  | 125.34(10) |
| O(5)-Tb(1)-O(6)   | 64.91(9)   | O(2)-Tb(1)-O(6)   | 124.41(9)  |
| O(14)-Tb(1)-O(6)  | 74.17(11)  | O(12)-Tb(1)-O(6)  | 100.07(11) |
| O(9)-Tb(1)-O(6)   | 127.97(10) | O(15)-Tb(1)-O(6)  | 73.19(12)  |
| O(1)-Tb(1)-O(6)   | 151.87(10) | O(11)-Tb(1)-O(6)  | 66.65(11)  |
| O(5)-Ni(1)-N(1)   | 169.94(12) | O(5)-Ni(1)-O(2)   | 81.52(10)  |
| N(1)-Ni(1)-O(2)   | 88.52(12)  | O(5)-Ni(1)-N(2)   | 87.24(12)  |
| N(1)-Ni(1)-N(2)   | 102.76(13) | O(2)-Ni(1)-N(2)   | 168.56(11) |
| O(5)-Ni(1)-O(16)  | 89.45(12)  | N(1)-Ni(1)-O(16)  | 89.53(13)  |
| O(2)-Ni(1)-O(16)  | 92.33(11)  | N(2)-Ni(1)-O(16)  | 89.71(12)  |
| O(5)-Ni(1)-O(8)   | 92.22(10)  | N(1)-Ni(1)-O(8)   | 88.71(12)  |
| O(2)-Ni(1)-O(8)   | 87.31(10)  | N(2)-Ni(1)-O(8)   | 90.99(12)  |
| O(16)-Ni(1)-O(8)  | 178.21(12) |                   |            |

**Table S5** Selected bond lengths (Å) and angles (°) for **5**.

|                  |            |                   |            |
|------------------|------------|-------------------|------------|
| Dy(1)-O(4)       | 2.239(3)   | Dy(1)-O(1)        | 2.293(3)   |
| Dy(1)-O(9)       | 2.407(4)   | Dy(1)-O(14)       | 2.415(3)   |
| Dy(1)-O(11)      | 2.417(3)   | Dy(1)-O(8)        | 2.434(4)   |
| Dy(1)-O(5)       | 2.436(3)   | Dy(1)-O(12)       | 2.482(4)   |
| Dy(1)-O(6)       | 2.542(3)   | Dy(1)-Ni(1)       | 3.3435(7)  |
| Ni(1)-O(4)       | 2.002(3)   | Ni(1)-O(1)        | 2.020(3)   |
| Ni(1)-N(1)       | 2.029(4)   | Ni(1)-N(2)        | 2.063(4)   |
| Ni(1)-O(16)      | 2.071(3)   | Ni(1)-O(15)       | 2.120(3)   |
| O(4)-Dy(1)-O(1)  | 70.89(10)  | O(4)-Dy(1)-O(9)   | 131.95(13) |
| O(1)-Dy(1)-O(9)  | 118.01(14) | O(4)-Dy(1)-O(14)  | 81.41(11)  |
| O(1)-Dy(1)-O(14) | 73.74(10)  | O(9)-Dy(1)-O(14)  | 146.13(13) |
| O(4)-Dy(1)-O(11) | 133.07(12) | O(1)-Dy(1)-O(11)  | 135.67(12) |
| O(9)-Dy(1)-O(11) | 76.20(15)  | O(14)-Dy(1)-O(11) | 74.82(13)  |
| O(4)-Dy(1)-O(8)  | 91.54(14)  | O(1)-Dy(1)-O(8)   | 75.59(13)  |

|                   |            |                   |            |
|-------------------|------------|-------------------|------------|
| O(9)-Dy(1)-O(8)   | 52.14(15)  | O(14)-Dy(1)-O(8)  | 149.17(13) |
| O(11)-Dy(1)-O(8)  | 128.07(15) | O(4)-Dy(1)-O(5)   | 136.35(10) |
| O(1)-Dy(1)-O(5)   | 66.23(10)  | O(9)-Dy(1)-O(5)   | 77.83(14)  |
| O(14)-Dy(1)-O(5)  | 79.28(12)  | O(11)-Dy(1)-O(5)  | 77.86(12)  |
| O(8)-Dy(1)-O(5)   | 85.68(15)  | O(4)-Dy(1)-O(12)  | 83.29(12)  |
| O(1)-Dy(1)-O(12)  | 138.63(11) | O(9)-Dy(1)-O(12)  | 103.32(15) |
| O(14)-Dy(1)-O(12) | 70.80(13)  | O(11)-Dy(1)-O(12) | 50.91(13)  |
| O(8)-Dy(1)-O(12)  | 138.45(15) | O(5)-Dy(1)-O(12)  | 125.28(12) |
| O(4)-Dy(1)-O(6)   | 65.11(11)  | O(1)-Dy(1)-O(6)   | 124.65(10) |
| O(9)-Dy(1)-O(6)   | 74.09(14)  | O(14)-Dy(1)-O(6)  | 127.76(12) |
| O(11)-Dy(1)-O(6)  | 99.32(13)  | O(8)-Dy(1)-O(6)   | 73.79(15)  |
| O(5)-Dy(1)-O(6)   | 151.59(12) | O(12)-Dy(1)-O(6)  | 66.65(13)  |
| O(4)-Ni(1)-O(1)   | 81.62(12)  | O(4)-Ni(1)-N(1)   | 169.97(14) |
| O(1)-Ni(1)-N(1)   | 88.50(14)  | O(4)-Ni(1)-N(2)   | 87.09(13)  |
| O(1)-Ni(1)-N(2)   | 168.51(13) | N(1)-Ni(1)-N(2)   | 102.84(15) |
| O(4)-Ni(1)-O(16)  | 89.40(14)  | O(1)-Ni(1)-O(16)  | 92.75(13)  |
| N(1)-Ni(1)-O(16)  | 89.30(16)  | N(2)-Ni(1)-O(16)  | 89.24(14)  |
| O(4)-Ni(1)-O(15)  | 92.49(12)  | O(1)-Ni(1)-O(15)  | 87.53(12)  |
| N(1)-Ni(1)-O(15)  | 88.84(15)  | N(2)-Ni(1)-O(15)  | 90.85(14)  |
| O(16)-Ni(1)-O(15) | 178.11(14) |                   |            |

**Table S6.** Results of the Continuous Shape Measure Analysis geometry<sup>a</sup>

| Geometry | JSPC-10 | SDD-10      | TD-10 |
|----------|---------|-------------|-------|
| <b>1</b> | 3.00    | <b>1.82</b> | 1.94  |
| <b>2</b> | 2.94    | <b>1.86</b> | 1.96  |

<sup>a</sup>JSPC-10 is the shape measure relative to the sphenocorona J87; SDD-10 is the shape measure relative to the staggered dodecahedron (2:6:2); TD-10 is the shape measure relative to the tetradecahedron (2:6:2).

| Geometry | MFF-9 | CSAPR-9     | JCSAPR-9 | TCTPR-9     |
|----------|-------|-------------|----------|-------------|
| <b>3</b> | 2.64  | 2.72        | 3.90     | <b>2.38</b> |
| <b>4</b> | 2.00  | <b>1.70</b> | 3.02     | 2.82        |
| <b>5</b> | 2.09  | <b>1.77</b> | 3.08     | 2.86        |

<sup>a</sup>MFF-9 is the shape measure relative to the muffin; CSAPR-9 is the shape measure relative to the spherical capped square antiprism; JCSAPR-9 is the shape measure relative to the capped square antiprism; TCTPR-9 is the shape measure relative to the spherical tricapped trigonal prism. The number in bold corresponds to the closer ideal

geometry to the real complexes.

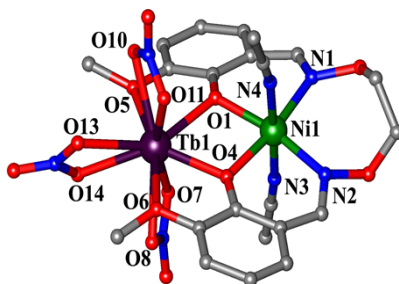

**Figure S1.** Perspective drawing of the crystallographically structural unit of **2** showing the atom numbering. H atoms are omitted for clarity.

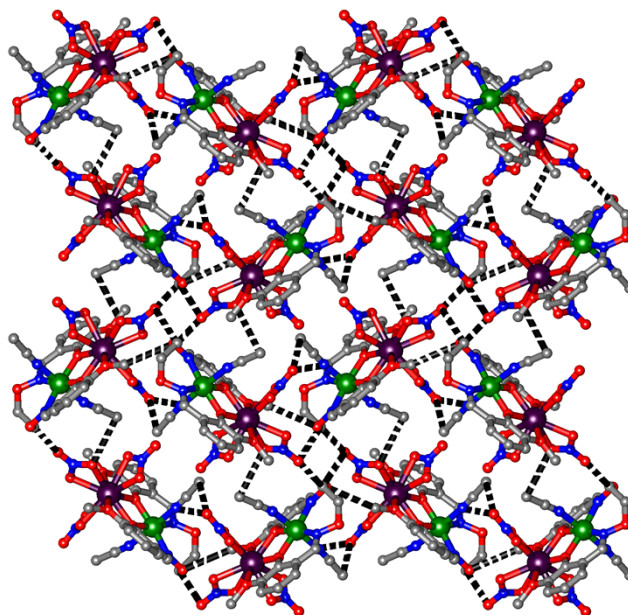

**Figure S2.** A view showing 3D structure formed by weak H-bonding interactions (black dash lines) in **1**.

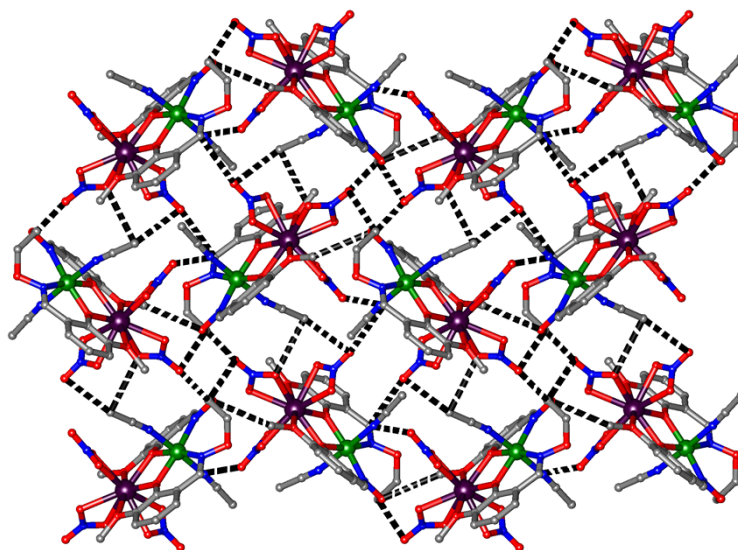

**Figure S3.** A view showing 3D structure formed by weak H-bonding interactions (black dash lines) in **2**.

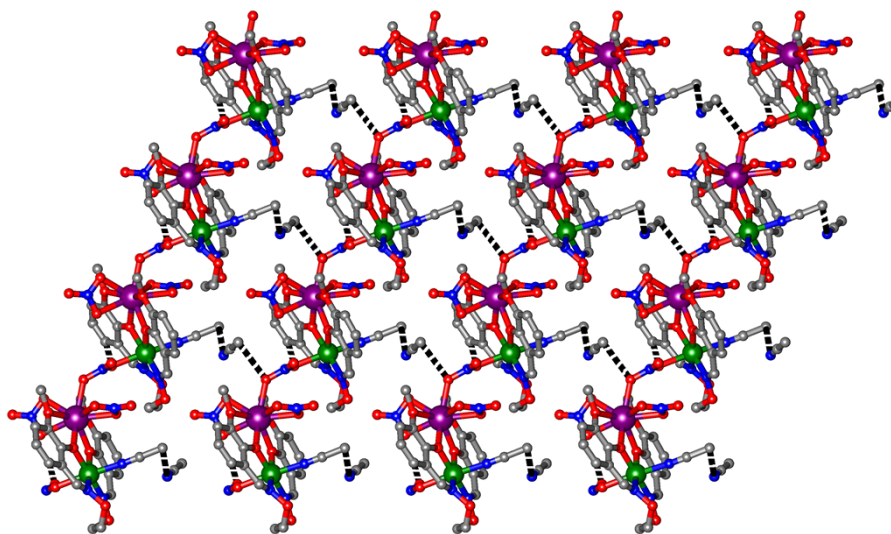

**Figure S4.** A view showing 2D structure formed by weak H-bonding interactions (black dash lines) in **3**.



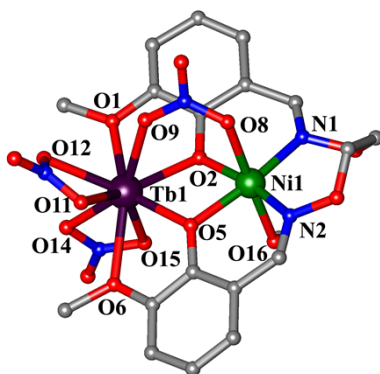

**Figure S5.** Perspective drawing of the crystallographically structural unit of **4** showing the atom numbering. H atoms and one solvated diethyl ether molecule are omitted for clarity.

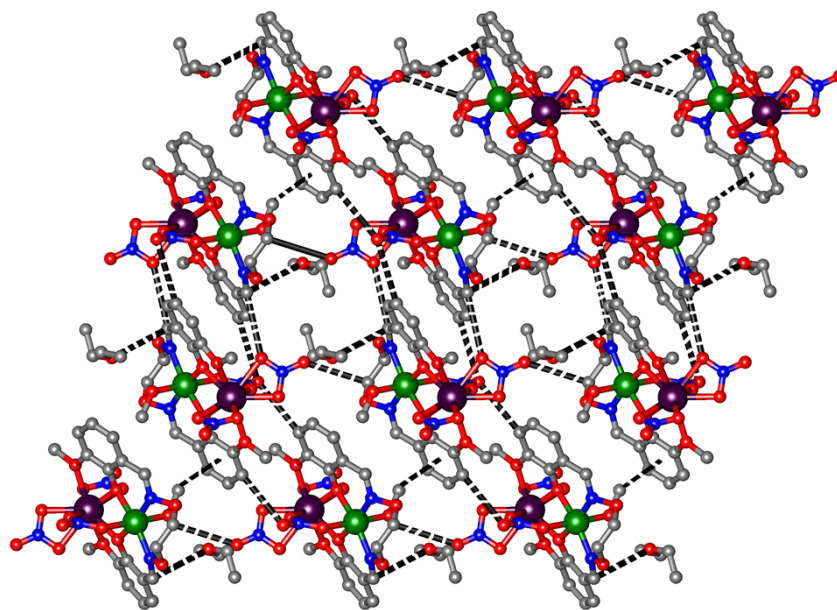

**Figure S6.** A view showing 3D structure formed by weak H-bonding interactions and CH $\cdots$  $\pi$  interactions (black dash lines) in **4**.

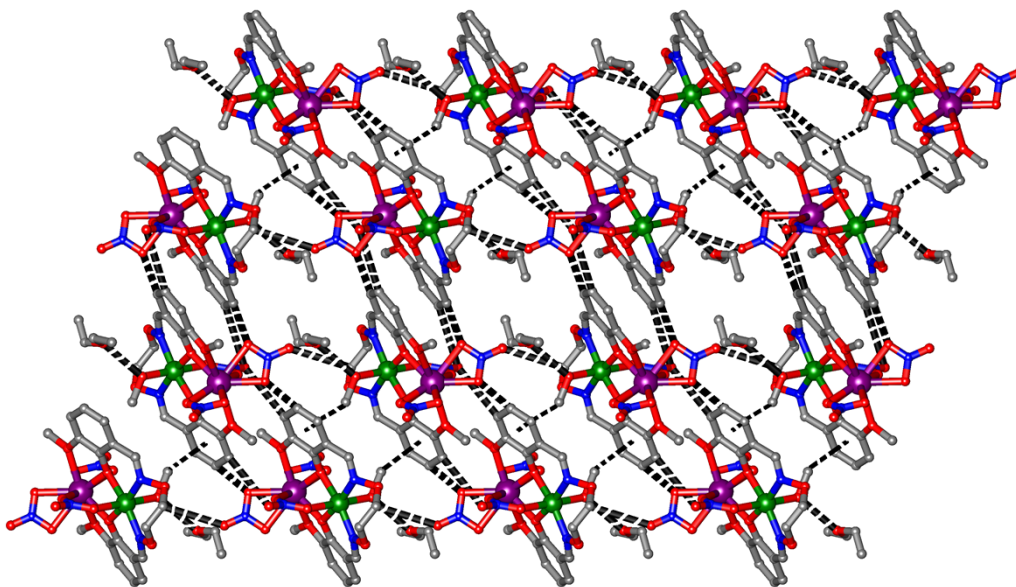

**Figure S7.** A view showing 3D structure formed by weak H-bonding interactions and CH $\cdots$  $\pi$  interactions (black dash lines) in **5**.

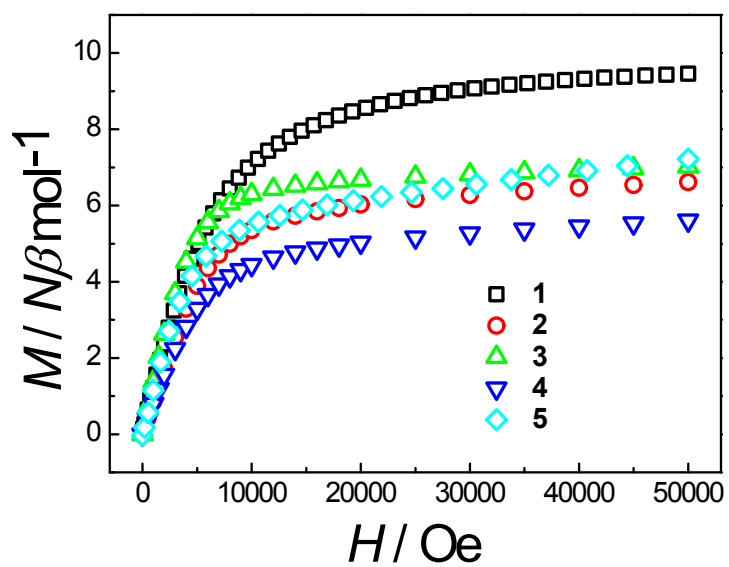

**Figure S8.** Field dependence of magnetization for **1-5** at low temperatures.

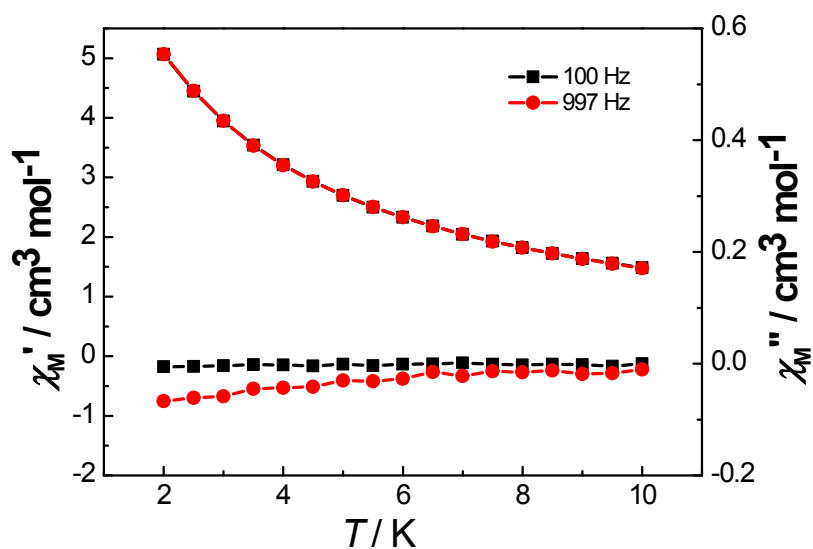

**Figure S9.** Temperature dependence of the in-phase  $\chi'$  and out-of-phase  $\chi''$  in a 2 Oe ac field oscillating at 100 and 999 Hz with a zero applied dc field for **2**.

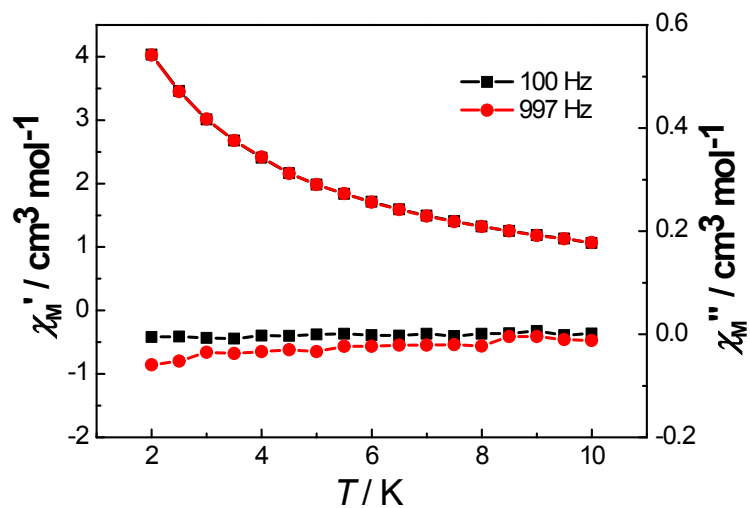

**Figure S10.** Temperature dependence of the in-phase  $\chi'$  and out-of-phase  $\chi''$  in a 2 Oe ac field oscillating at 100 and 999 Hz with a zero applied dc field for **4**.

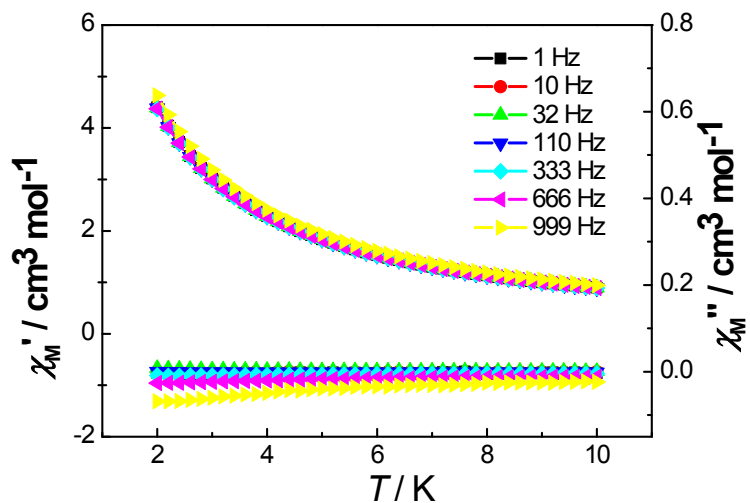

**Figure S11.** Temperature dependence of the in-phase  $\chi'$  and out-of-phase  $\chi''$  at different frequencies in a 2 Oe ac field oscillating at 1–999 Hz with a zero applied dc field for **5**.

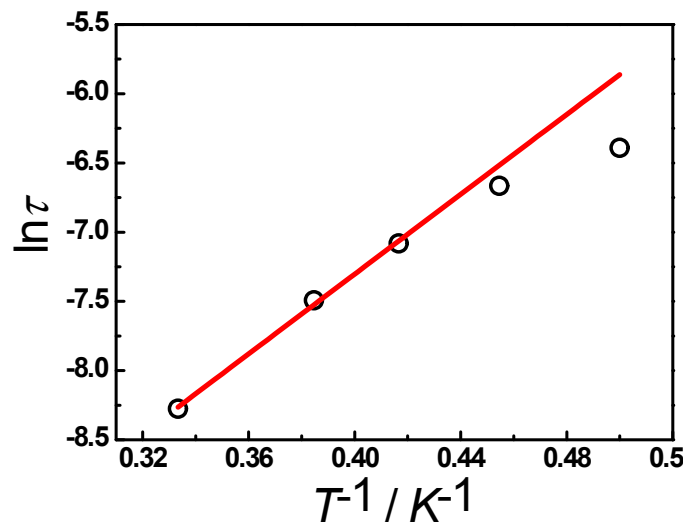

**Figure S12.** the Arrhenius fit for the  $\ln \tau$  vs  $T^{-1}$  plot from ac-f data of **3**. The red solid line represents the best fits of the data.

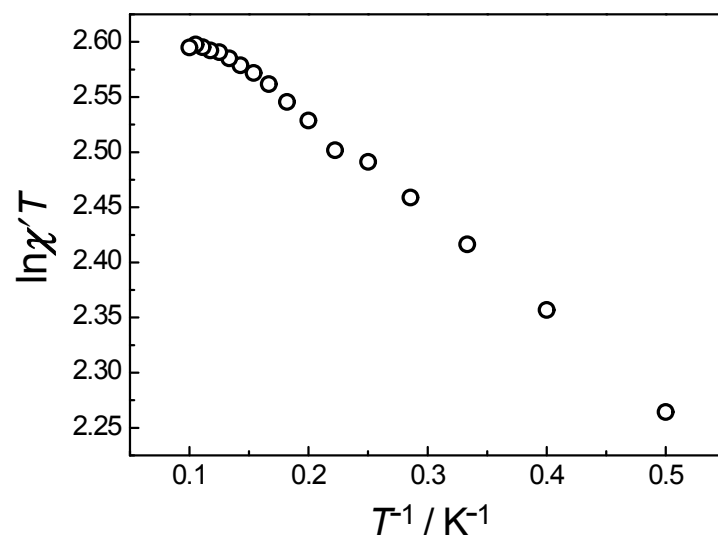

**Figure S13.**  $\ln(\chi'T)$  vs  $T^{-1}$  plots on a semi-logarithmic scale from polycrystalline samples of **3**.
